# Supplementary material for: Plasma Surface Modification of Epoxy Polymer in Air DBD and Gliding Arc
Source: MDPI journal article supplement (doi:10.3390/pr10010104), 2022-01-05
Supplement: s1 [file s1]

Archive with 1 entries (1 files):
- processes-1465053-supplementary.pdf
